# Supplementary material for: Development of enzymatically crosslinked natural deep eutectogels: versatile gels for enhanced drug delivery
Source: Royal Society of Chemistry journal article supplement (doi:10.1039/d4tb01672f), 2024-01-01
Supplement: d4tb01672f1.pdf [file d4tb01672f1.pdf]

## Supplementary Information

### **Development of Enzymatically Crosslinked Natural Deep Eutectogels: Versatile Gels for Enhanced Drug Delivery**

Liane Meneses<sup>1</sup>, Dimitra Antonia Bagaki<sup>1</sup>, Ana Roda<sup>1</sup>, Alexandre Paiva<sup>1</sup>, Ana Rita C. Duarte<sup>1,\*</sup>

<sup>1</sup>LAQV-REQUIMTE, Departamento de Química, Faculdade de Ciências e Tecnologia, Universidade Nova de Lisboa, 2829-516 Caparica, Portugal

\*Corresponding author: ard08968@fct.unl.pt

## Supplementary Figures

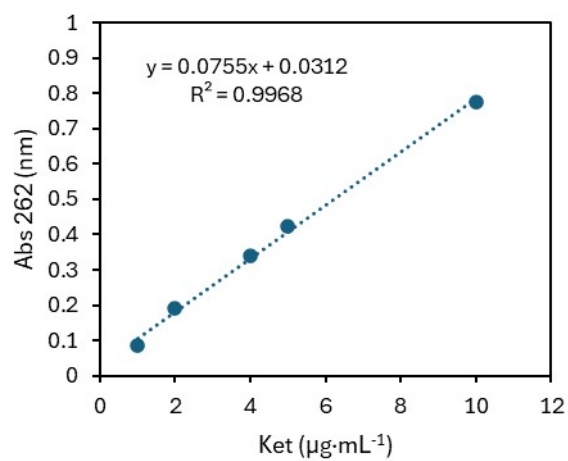

Figure S1 - Calibration curve of ketoprofen in PBS in concentration ranging from 10 to 1  $\mu\text{g}\cdot\text{mL}^{-1}$  and linear regression used for the quantification of ketoprofen on the release studies.

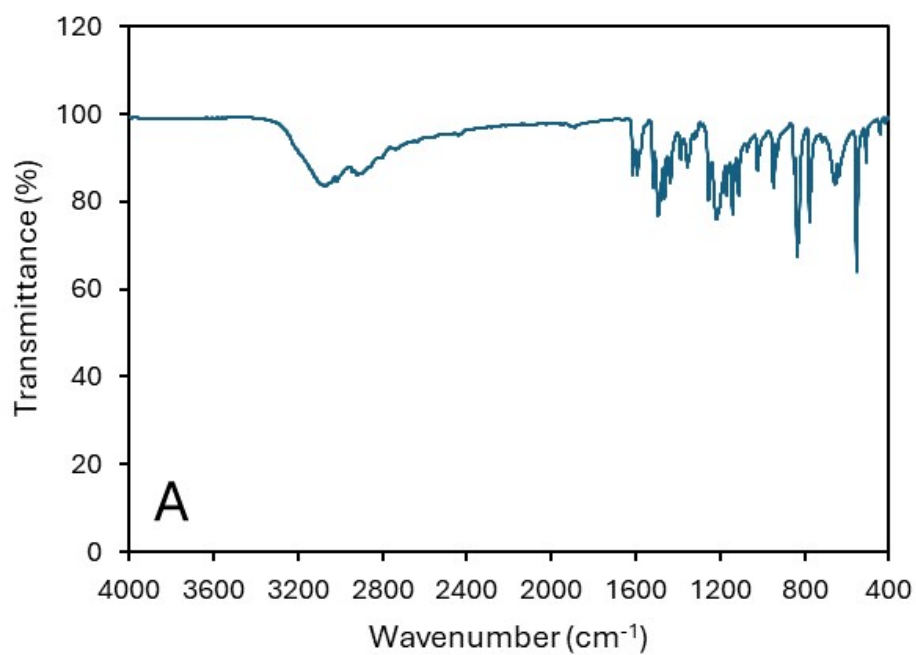

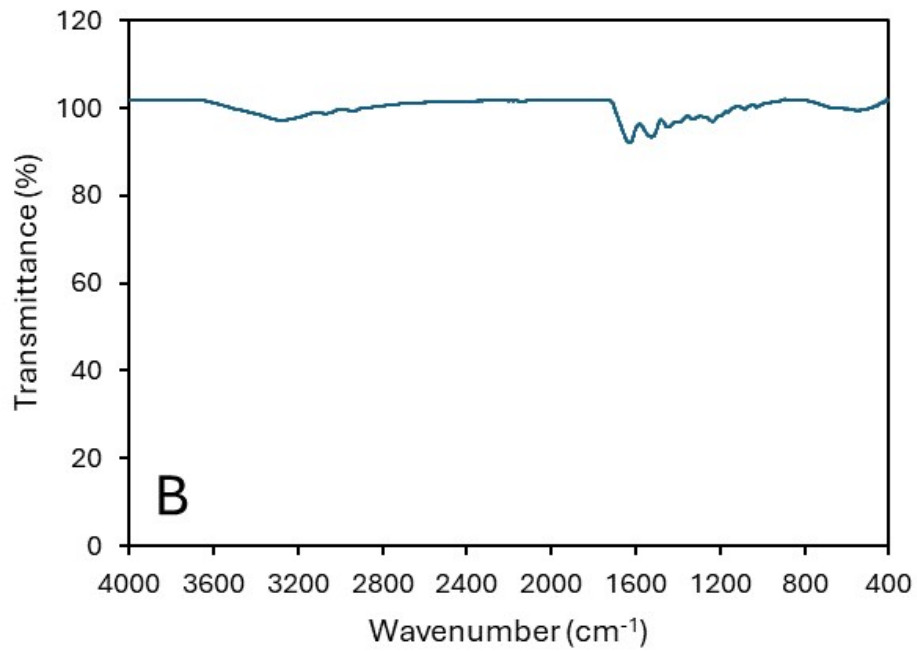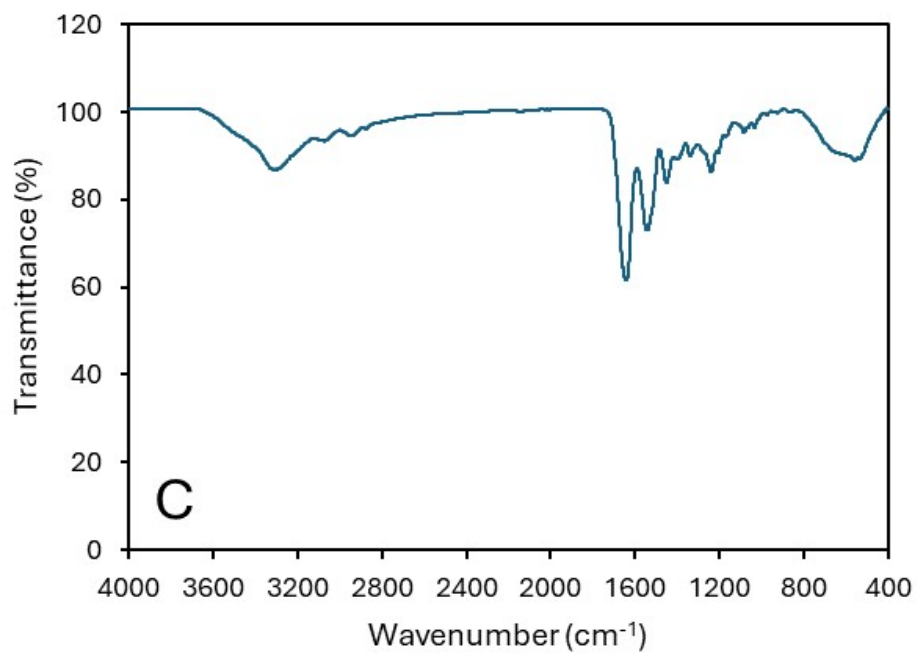

Figure S2 – ATR-FTIR spectra obtained for A) tyramine hydrochloride, B) gelatine, C) Glt-Ph conjugate. The spectra were obtained between 4000 and 400 cm<sup>-1</sup>, in transmittance mode.

## Supplementary Tables

Table S1 – Gelation time obtained for each individual replica of gels prepared with different concentrations of HRP.

| HRP<br>(U·mL <sup>-1</sup> ) | Gelation time (secs) |    |    |
|------------------------------|----------------------|----|----|
|                              | R1                   | R2 | R3 |
| 5                            | 42                   | 57 | 57 |
| 10                           | 24                   | 30 | 36 |

Table S2 – Data obtained for the measurements of viscosity (mPa·s) as function of shear rate (1/s) for three individual replicas of the mixture 5 %w/v Glt-Ph in 90BGly.

| Shear Rate<br>1/s | R1                 | R2                 | R3                 |
|-------------------|--------------------|--------------------|--------------------|
|                   | Viscosity<br>mPa·s | Viscosity<br>mPa·s | Viscosity<br>mPa·s |
| 0.00998           | 6.76E+06           | 2.11E+06           | 2.11E+06           |
| 0.0149            | 5.72E+06           | 1.37E+06           | 1.37E+06           |
| 0.0221            | 4.43E+06           | 9.78E+05           | 9.78E+05           |
| 0.0329            | 3.98E+06           | 6.68E+05           | 6.68E+05           |
| 0.0489            | 2.78E+06           | 3.49E+05           | 3.49E+05           |
| 0.0728            | 2.53E+06           | 3.72E+05           | 3.72E+05           |
| 0.108             | 1.71E+06           | 2.41E+05           | 2.41E+05           |
| 0.161             | 9.60E+05           | 3.36E+05           | 3.36E+05           |
| 0.24              | 4.23E+05           | 2.43E+05           | 2.43E+05           |
| 0.356             | 2.54E+05           | 1.43E+05           | 1.43E+05           |
| 0.53              | 95804              | 1.16E+05           | 1.16E+05           |
| 0.788             | 1.04E+05           | 1.08E+05           | 1.08E+05           |
| 1.17              | 45888              | 57810              | 57810              |
| 1.74              | 37231              | 54453              | 54453              |
| 2.59              | 28685              | 29744              | 29744              |
| 3.86              | 21800              | 23969              | 23969              |
| 5.74              | 16897              | 17113              | 17113              |
| 8.53              | 12588              | 10556              | 10556              |
| 12.7              | 9908.2             | 8647               | 8647               |

Table S3 - Storage ( $G'$ ) and loss ( $G''$ ) moduli as a function of frequency ( $\text{rad}\cdot\text{s}^{-1}$ ) obtained for three individual replicas of hydrogel prepared with HRP concentration of  $10 \text{ U}\cdot\text{mL}^{-1}$ .

| Frequency<br>$\text{rad}\cdot\text{s}^{-1}$ | R1          |            | R2          |            | R3          |            |
|---------------------------------------------|-------------|------------|-------------|------------|-------------|------------|
|                                             | $G''$<br>Pa | $G'$<br>Pa | $G''$<br>Pa | $G'$<br>Pa | $G''$<br>Pa | $G'$<br>Pa |
| 11                                          | 94.917      | 752.11     | 37.663      | 597.89     | 41.087      | 673.2      |
| 8.63                                        | 92.635      | 828.96     | 36.397      | 668.65     | 40.553      | 748.31     |
| 6.8                                         | 89.966      | 875.47     | 34.897      | 711.44     | 39.6        | 792.47     |
| 5.36                                        | 86.995      | 904.56     | 33.531      | 737.79     | 38.695      | 818.24     |
| 4.22                                        | 84.107      | 922.56     | 32.168      | 753.37     | 37.914      | 832.48     |
| 3.33                                        | 81.535      | 935.32     | 30.869      | 762.4      | 36.527      | 839.72     |
| 2.62                                        | 79.131      | 944.93     | 30.087      | 767.57     | 35.645      | 842.76     |
| 2.07                                        | 76.73       | 951.33     | 29.109      | 769.32     | 34.607      | 841.65     |
| 1.63                                        | 74.463      | 955.25     | 28.204      | 768.86     | 33.562      | 838.08     |
| 1.28                                        | 73.171      | 956.92     | 27.359      | 766        | 32.371      | 832.76     |
| 1.01                                        | 71.766      | 958.67     | 27.29       | 762.55     | 31.591      | 825.12     |
| 0.797                                       | 69.893      | 960.92     | 26.016      | 759.83     | 30.9        | 818.45     |
| 0.628                                       | 69.621      | 961.99     | 25.629      | 755.99     | 30.291      | 812.06     |

Table S4 - Storage ( $G'$ ) and loss ( $G''$ ) moduli as a function of frequency ( $\text{rad}\cdot\text{s}^{-1}$ ) obtained for two individual replicas of hydrogel prepared with HRP concentration of  $5 \text{ U}\cdot\text{mL}^{-1}$ .

| Frequency<br>$\text{rad}\cdot\text{s}^{-1}$ | R1          |            | R2          |            |
|---------------------------------------------|-------------|------------|-------------|------------|
|                                             | $G''$<br>Pa | $G'$<br>Pa | $G''$<br>Pa | $G'$<br>Pa |
| 11                                          | 74.75       | 597.64     | 32.285      | 775.17     |
| 8.63                                        | 73.66       | 670.49     | 32.121      | 855.96     |
| 6.8                                         | 74.169      | 713.25     | 32.055      | 903.67     |
| 5.36                                        | 74.737      | 737.22     | 31.882      | 932.1      |
| 4.22                                        | 76.168      | 748.27     | 31.949      | 947.85     |
| 3.33                                        | 77.316      | 752.26     | 32.042      | 956.03     |
| 2.62                                        | 78.437      | 752.07     | 32.141      | 959.71     |
| 2.07                                        | 79.162      | 747.48     | 32.108      | 959.04     |
| 1.63                                        | 79.634      | 740.33     | 32.201      | 956.37     |
| 1.28                                        | 79.495      | 731.91     | 31.876      | 951.82     |
| 1.01                                        | 79.897      | 721.15     | 33.626      | 945.06     |
| 0.797                                       | 79.935      | 710.29     | 32.639      | 939.78     |
| 0.628                                       | 81.001      | 699.55     | 32.637      | 934.52     |

Table S5 - Storage ( $G'$ ) and loss ( $G''$ ) moduli as a function of frequency ( $\text{rad}\cdot\text{s}^{-1}$ ) obtained for three individual replicas of eutectogel prepared with HRP concentration of  $10 \text{ U}\cdot\text{mL}^{-1}$ , at different time points (0, 1 month, 3 months and 1 year).

| <b>Time 0</b>                                      |                               |                              |                               |                              |                               |                              |
|----------------------------------------------------|-------------------------------|------------------------------|-------------------------------|------------------------------|-------------------------------|------------------------------|
|                                                    | R1                            |                              | R2                            |                              | R3                            |                              |
| <b>Frequency</b><br>$\text{rad}\cdot\text{s}^{-1}$ | <b><math>G''</math></b><br>Pa | <b><math>G'</math></b><br>Pa | <b><math>G''</math></b><br>Pa | <b><math>G'</math></b><br>Pa | <b><math>G''</math></b><br>Pa | <b><math>G'</math></b><br>Pa |
| 11                                                 | 36.492                        | 50.831                       | 32.688                        | 254.03                       | 30.332                        | 400.26                       |
| 8.63                                               | 32.835                        | 123.76                       | 28.486                        | 328.41                       | 26.882                        | 475.83                       |
| 6.8                                                | 29.966                        | 168.48                       | 25.096                        | 373.99                       | 23.964                        | 521.79                       |
| 5.36                                               | 27.43                         | 195.06                       | 22.245                        | 401.17                       | 21.707                        | 548.95                       |
| 4.22                                               | 25.415                        | 211.46                       | 19.987                        | 417.79                       | 20.115                        | 566.12                       |
| 3.33                                               | 23.907                        | 221.4                        | 18.24                         | 427.56                       | 18.492                        | 576.66                       |
| 2.62                                               | 22.818                        | 229.51                       | 17.04                         | 435.04                       | 17.54                         | 582.46                       |
| 2.07                                               | 21.915                        | 234.44                       | 15.998                        | 438.56                       | 16.692                        | 587.27                       |
| 1.63                                               | 21.265                        | 239.13                       | 15.206                        | 441.3                        | 16.062                        | 591.49                       |
| 1.28                                               | 20.884                        | 244.81                       | 14.708                        | 444.22                       | 15.692                        | 596.84                       |
| 1.01                                               | 20.872                        | 251.89                       | 14.845                        | 448.42                       | 15.968                        | 602.64                       |
| 0.797                                              | 21.534                        | 259.79                       | 15.398                        | 451.62                       | 17.25                         | 608.36                       |
| 0.628                                              | 22.15                         | 268.89                       | 15.816                        | 455.95                       | 18.017                        | 615.69                       |

  

| <b>1 month</b>                                     |                               |                              |                               |                              |                               |                              |
|----------------------------------------------------|-------------------------------|------------------------------|-------------------------------|------------------------------|-------------------------------|------------------------------|
|                                                    | R1                            |                              | R2                            |                              | R3                            |                              |
| <b>Frequency</b><br>$\text{rad}\cdot\text{s}^{-1}$ | <b><math>G''</math></b><br>Pa | <b><math>G'</math></b><br>Pa | <b><math>G''</math></b><br>Pa | <b><math>G'</math></b><br>Pa | <b><math>G''</math></b><br>Pa | <b><math>G'</math></b><br>Pa |
| 11                                                 | 84.737                        | 170.08                       | 69.36                         | 122.58                       | 62.218                        | 78.616                       |
| 8.63                                               | 74.397                        | 253.37                       | 94.285                        | 153.23                       | 66.532                        | 126.82                       |
| 6.8                                                | 65.594                        | 301.69                       | 85.35                         | 200.8                        | 59.565                        | 179.45                       |
| 5.36                                               | 57.793                        | 329.34                       | 77.784                        | 227.81                       | 53.546                        | 210.27                       |
| 4.22                                               | 51.396                        | 345.77                       | 71.41                         | 242.73                       | 48.515                        | 228.55                       |
| 3.33                                               | 45.656                        | 355.49                       | 65.744                        | 251.39                       | 44.222                        | 239.18                       |
| 2.62                                               | 40.87                         | 362.21                       | 60.874                        | 256.96                       | 40.65                         | 246.19                       |
| 2.07                                               | 36.498                        | 365.53                       | 56.314                        | 258.95                       | 37.443                        | 249.14                       |
| 1.63                                               | 32.692                        | 367.95                       | 52.412                        | 260.08                       | 34.809                        | 250.81                       |
| 1.28                                               | 29.582                        | 369.8                        | 48.846                        | 261.13                       | 32.477                        | 251.72                       |
| 1.01                                               | 26.862                        | 371.93                       | 45.933                        | 262.5                        | 30.738                        | 252.25                       |
| 0.797                                              | 24.448                        | 373.38                       | 43.014                        | 263.42                       | 29.188                        | 252.2                        |
| 0.628                                              | 22.69                         | 374.78                       | 40.758                        | 264.47                       | 27.808                        | 251.6                        |

| <b>3 months</b>                         |                  |                 |                  |                 |                  |                 |
|-----------------------------------------|------------------|-----------------|------------------|-----------------|------------------|-----------------|
|                                         | R1               |                 | R2               |                 | R3               |                 |
| <b>Frequency</b><br>rad·s <sup>-1</sup> | <b>G''</b><br>Pa | <b>G'</b><br>Pa | <b>G''</b><br>Pa | <b>G'</b><br>Pa | <b>G''</b><br>Pa | <b>G'</b><br>Pa |
| 11                                      | 73.266           | 110.76          | 77.168           | 382.17          | 63.2             | 92.549          |
| 8.63                                    | 75.478           | 127.33          | 67.822           | 452.52          | 69.584           | 119.14          |
| 6.8                                     | 66.332           | 167.89          | 59.602           | 493.79          | 61.961           | 160.35          |
| 5.36                                    | 58.707           | 190.23          | 52.466           | 517.14          | 55.594           | 184.26          |
| 4.22                                    | 52.078           | 202.66          | 46.453           | 529.99          | 50.058           | 197.44          |
| 3.33                                    | 46.341           | 209.23          | 41.406           | 536.53          | 45.331           | 204.4           |
| 2.62                                    | 41.373           | 213.86          | 37.185           | 539.4           | 41.265           | 208.91          |
| 2.07                                    | 36.841           | 214.88          | 33.527           | 539.21          | 37.561           | 209.74          |
| 1.63                                    | 32.923           | 215             | 30.382           | 537.82          | 34.254           | 209.68          |
| 1.28                                    | 29.391           | 214.71          | 27.799           | 535.69          | 31.293           | 209.1           |
| 1.01                                    | 26.335           | 214.37          | 25.672           | 533.16          | 28.591           | 208.61          |
| 0.797                                   | 23.634           | 213.96          | 24               | 530.44          | 26.144           | 207.95          |
| 0.628                                   | 21.282           | 213.53          | 22.538           | 527.81          | 24.12            | 207.24          |

| <b>1 year</b>                           |                  |                 |                  |                 |                  |                 |
|-----------------------------------------|------------------|-----------------|------------------|-----------------|------------------|-----------------|
|                                         | R1               |                 | R2               |                 | R3               |                 |
| <b>Frequency</b><br>rad·s <sup>-1</sup> | <b>G''</b><br>Pa | <b>G'</b><br>Pa | <b>G''</b><br>Pa | <b>G'</b><br>Pa | <b>G''</b><br>Pa | <b>G'</b><br>Pa |
| 11                                      | 71.751           | 374.24          | 87.079           | 766.83          | 71.515           | 372.69          |
| 8.63                                    | 62.68            | 451.44          | 77.644           | 843.02          | 64.865           | 450.58          |
| 6.8                                     | 54.652           | 497.51          | 69.301           | 888.2           | 59.413           | 497.84          |
| 5.36                                    | 48.082           | 524.63          | 62.223           | 914.19          | 56.381           | 523.79          |
| 4.22                                    | 42.403           | 540.11          | 56.28            | 928.58          | 53.088           | 538.11          |
| 3.33                                    | 37.693           | 548.37          | 51.438           | 935.63          | 50.34            | 544.59          |
| 2.62                                    | 33.938           | 552.78          | 47.526           | 938.75          | 49.962           | 549.76          |
| 2.07                                    | 30.628           | 554.14          | 44.169           | 939.01          | 48.662           | 552.48          |
| 1.63                                    | 27.914           | 554.01          | 41.447           | 937.95          | 47.012           | 552.35          |
| 1.28                                    | 25.69            | 553.1           | 39.376           | 935.69          | 46.275           | 545.74          |
| 1.01                                    | 23.908           | 551.69          | 38.044           | 935.01          | 44.458           | 541.48          |
| 0.797                                   | 22.399           | 549.97          | 36.46            | 935.17          | 43.96            | 536.99          |
| 0.628                                   | 21.195           | 548.17          | 35.569           | 931.79          | 43.684           | 531.51          |

Table S6 - Storage ( $G'$ ) and loss ( $G''$ ) moduli as a function of frequency ( $\text{rad}\cdot\text{s}^{-1}$ ) obtained for individual replicas of eutectogel prepared with HRP concentration of  $5 \text{ U}\cdot\text{mL}^{-1}$ , at different time points (0, 1 month, 3 months and 1 year).

| <b>Time 0</b>                                      |                               |                              |                               |                              |
|----------------------------------------------------|-------------------------------|------------------------------|-------------------------------|------------------------------|
| <b>Frequency</b><br>$\text{rad}\cdot\text{s}^{-1}$ | R1                            |                              | R2                            |                              |
|                                                    | <b><math>G''</math></b><br>Pa | <b><math>G'</math></b><br>Pa | <b><math>G''</math></b><br>Pa | <b><math>G'</math></b><br>Pa |
| 11                                                 | 30.574                        | 60.613                       | 32.597                        | 150.06                       |
| 8.63                                               | 27.114                        | 143.19                       | 29.102                        | 231.38                       |
| 6.8                                                | 23.759                        | 192.98                       | 26.17                         | 279.46                       |
| 5.36                                               | 21.261                        | 222.88                       | 23.548                        | 308.12                       |
| 4.22                                               | 19.041                        | 240.4                        | 21.415                        | 323.86                       |
| 3.33                                               | 17.153                        | 250.65                       | 19.707                        | 331.79                       |
| 2.62                                               | 15.81                         | 256.61                       | 18.57                         | 335.18                       |
| 2.07                                               | 14.421                        | 258.86                       | 17.423                        | 334.38                       |
| 1.63                                               | 13.377                        | 259.37                       | 16.595                        | 331.57                       |
| 1.28                                               | 12.515                        | 258.75                       | 16.011                        | 326.73                       |
| 1.01                                               | 11.825                        | 257.18                       | 15.322                        | 321.04                       |
| 0.797                                              | 11.416                        | 255.01                       | 14.276                        | 315.4                        |
| 0.628                                              | 11.048                        | 252.86                       | 13.772                        | 309.18                       |

| <b>1 month</b>                                     |                               |                              |                               |                              |                               |                              |
|----------------------------------------------------|-------------------------------|------------------------------|-------------------------------|------------------------------|-------------------------------|------------------------------|
| <b>Frequency</b><br>$\text{rad}\cdot\text{s}^{-1}$ | R1                            |                              | R2                            |                              | R3                            |                              |
|                                                    | <b><math>G''</math></b><br>Pa | <b><math>G'</math></b><br>Pa | <b><math>G''</math></b><br>Pa | <b><math>G'</math></b><br>Pa | <b><math>G''</math></b><br>Pa | <b><math>G'</math></b><br>Pa |
| 11                                                 | 49.33                         | 73.878                       | 49.155                        | 46.938                       | 65.098                        | 133.95                       |
| 8.63                                               | 45.832                        | 101.43                       | 43.163                        | 140.39                       | 66.317                        | 198.1                        |
| 6.8                                                | 40.249                        | 156.27                       | 37.925                        | 196.38                       | 57.505                        | 249.17                       |
| 5.36                                               | 35.492                        | 188.96                       | 33.18                         | 229.94                       | 51.71                         | 279.49                       |
| 4.22                                               | 31.221                        | 208.33                       | 29.195                        | 249.85                       | 45.814                        | 297.5                        |
| 3.33                                               | 27.681                        | 219.6                        | 25.89                         | 261.3                        | 40.762                        | 307.41                       |
| 2.62                                               | 24.807                        | 226.73                       | 23.097                        | 267.86                       | 36.766                        | 312.9                        |
| 2.07                                               | 22.211                        | 229.66                       | 20.594                        | 270.79                       | 33.103                        | 316.21                       |
| 1.63                                               | 20.038                        | 230.85                       | 18.58                         | 271.9                        | 29.945                        | 317.36                       |
| 1.28                                               | 18.129                        | 231.01                       | 16.914                        | 271.97                       | 27.081                        | 318.23                       |
| 1.01                                               | 16.536                        | 230.61                       | 15.561                        | 271.41                       | 24.805                        | 319.07                       |
| 0.797                                              | 15.237                        | 229.89                       | 14.431                        | 270.45                       | 22.876                        | 319.19                       |
| 0.628                                              | 14.116                        | 228.88                       | 13.492                        | 269.43                       | 21.054                        | 318.47                       |



| <b>3 months</b>                         |                  |                 |                  |                 |                  |                 |
|-----------------------------------------|------------------|-----------------|------------------|-----------------|------------------|-----------------|
|                                         | R1               |                 | R2               |                 | R3               |                 |
| <b>Frequency</b><br>rad·s <sup>-1</sup> | <b>G''</b><br>Pa | <b>G'</b><br>Pa | <b>G''</b><br>Pa | <b>G'</b><br>Pa | <b>G''</b><br>Pa | <b>G'</b><br>Pa |
| 11                                      | 66.266           | 303.44          | 71.005           | 177.51          | 60.072           | 211.8           |
| 8.63                                    | 57.041           | 375.22          | 61.221           | 255.09          | 51.781           | 289.78          |
| 6.8                                     | 49.135           | 418             | 52.874           | 301.47          | 44.57            | 336.44          |
| 5.36                                    | 42.486           | 443.48          | 45.63            | 328.62          | 38.446           | 363.88          |
| 4.22                                    | 36.848           | 457.93          | 39.532           | 344.37          | 33.295           | 379.94          |
| 3.33                                    | 32.083           | 465.33          | 34.254           | 353             | 28.903           | 389             |
| 2.62                                    | 28.146           | 468.78          | 29.897           | 358.23          | 25.365           | 394             |
| 2.07                                    | 24.791           | 469.53          | 26.067           | 359.87          | 22.22            | 395.82          |
| 1.63                                    | 22.02            | 468.61          | 22.928           | 360.02          | 19.597           | 396.05          |
| 1.28                                    | 19.551           | 466.4           | 20.307           | 359.28          | 17.451           | 395.35          |
| 1.01                                    | 17.566           | 463.55          | 18.119           | 358             | 15.681           | 394.05          |
| 0.797                                   | 15.801           | 460.64          | 16.357           | 356.37          | 14.228           | 392.42          |
| 0.628                                   | 14.255           | 457.2           | 14.908           | 354.66          | 12.994           | 390.77          |

| <b>1 year</b>                           |                  |                 |                  |                 |                  |                 |
|-----------------------------------------|------------------|-----------------|------------------|-----------------|------------------|-----------------|
|                                         | R1               |                 | R2               |                 | R3               |                 |
| <b>Frequency</b><br>rad·s <sup>-1</sup> | <b>G''</b><br>Pa | <b>G'</b><br>Pa | <b>G''</b><br>Pa | <b>G'</b><br>Pa | <b>G''</b><br>Pa | <b>G'</b><br>Pa |
| 11                                      | 78.63            | 427.99          | 74.739           | 444.66          | 76.141           | 201.03          |
| 8.63                                    | 68.259           | 509.8           | 65.525           | 528.85          | 68.189           | 283.69          |
| 6.8                                     | 59.405           | 558.73          | 57.909           | 578.12          | 60.823           | 332.56          |
| 5.36                                    | 52.169           | 587.3           | 51.355           | 606.96          | 54.704           | 360.27          |
| 4.22                                    | 46.062           | 603.46          | 46.061           | 623.17          | 49.748           | 375.34          |
| 3.33                                    | 40.933           | 612.17          | 42.122           | 635.04          | 45.564           | 383             |
| 2.62                                    | 36.729           | 616.13          | 38.258           | 643.73          | 42.175           | 385.42          |
| 2.07                                    | 33.166           | 617.27          | 34.939           | 644.93          | 38.945           | 385.13          |
| 1.63                                    | 30.285           | 616.8           | 32.431           | 643.29          | 36.488           | 383.64          |
| 1.28                                    | 27.937           | 615.33          | 30.551           | 640.13          | 34.435           | 380.95          |
| 1.01                                    | 25.984           | 613.26          | 29.113           | 636.1           | 32.557           | 379.55          |
| 0.797                                   | 24.317           | 611.08          | 27.845           | 631.53          | 31.185           | 378.09          |
| 0.628                                   | 23.028           | 608.67          | 28.558           | 623.66          | 30.268           | 376.13          |

Table S7 – Absorbance (Abs) obtained at 262 nm, and dilution factor (df), of the samples of the drug release from BGly.

| <b>Time</b><br>days | <b>BGly1</b> |    | <b>BGly2</b> |    | <b>BGly3</b> |    |
|---------------------|--------------|----|--------------|----|--------------|----|
|                     | Abs          | df | Abs          | df | Abs          | df |
| 0.00                | 0.075        | -  | 0.049        | -  | 0.06         | -  |
| 0.02                | 0.112        | -  | 0.059        | -  | 0.467        | -  |
| 0.04                | 0.13         | -  | 0.073        | -  | 0.634        | 8  |
| 0.08                | 0.156        | -  | 0.437        | -  | 0.562        | 8  |
| 0.17                | 0.532        | 4  | 0.934        | 16 | 0.562        | 8  |
| 0.25                | 0.652        | 16 | 0.582        | 32 | 0.687        | 32 |
| 0.33                | 0.588        | 32 | 0.785        | 32 | 0.468        | 32 |
| 1.00                | 0.560        | 32 | 0.725        | 64 | 0.743        | 32 |
| 2.00                | 0.498        | 50 | 0.594        | 50 | 0.553        | 50 |
| 3.00                | 0.639        | 50 | 0.586        | 50 | 0.509        | 50 |
| 6.00                | 0.721        | 50 | 0.553        | 50 | 0.577        | 50 |
| 8.00                | 0.675        | 50 | 0.577        | 50 | 0.669        | 50 |
| 10.00               | 0.72         | 50 | 0.651        | 50 | 0.659        | 50 |

Table S8 – Absorbance (Abs) obtained at 262 nm, and dilution factor (df), of the samples of the drug release from eutectogel.

| <b>Time</b><br>days | <b>Eutectogel 1</b> |    | <b>Eutectogel 2</b> |    | <b>Eutectogel 3</b> |    |
|---------------------|---------------------|----|---------------------|----|---------------------|----|
|                     | Abs                 | df | Abs                 | df | Abs                 | df |
| 0.00                | 0.257               | -  | 0.098               | -  | 0.097               | -  |
| 0.02                | 0.421               | -  | 0.174               | -  | 0.112               | -  |
| 0.04                | 0.424               | -  | 0.45                | -  | 0.152               | -  |
| 0.08                | 0.709               | -  | 0.447               | -  | 0.919               | -  |
| 0.17                | 1.095               | 16 | 0.51                | 8  | 0.603               | 16 |
| 0.25                | 0.626               | 32 | 0.56                | 8  | 1.066               | 16 |
| 0.33                | 0.884               | 32 | 0.467               | 8  | 1.096               | 16 |
| 1.00                | 0.481               | 64 | 0.911               | 16 | 0.611               | 32 |
| 2.00                | 0.525               | 50 | 0.459               | 50 | 0.388               | 50 |
| 3.00                | 0.561               | 50 | 0.501               | 50 | 0.478               | 50 |
| 6.00                | 0.642               | 50 | 0.581               | 50 | 0.51                | 50 |
| 8.00                | 0.605               | 50 | 0.61                | 50 | 0.605               | 50 |
| 10.00               | 0.634               | 50 | 0.762               | 50 | 0.708               | 50 |

Table S9 – Absorbances obtained from the MTS assay that were used to determine the cell viability in the presence of 90BGly 125 mg·mL<sup>-1</sup>, Glt-Ph 1.04 %w/v, H<sub>2</sub>O<sub>2</sub> 0.75 mM, and HRP 2.44 U·mL<sup>-1</sup>.

| <b>Sample</b>                     | <i>n = 1</i> |       |       | <i>n = 2</i> |       |       |
|-----------------------------------|--------------|-------|-------|--------------|-------|-------|
|                                   | Abs 1        | Abs 2 | Abs 3 | Abs 1        | Abs 2 | Abs 3 |
| <b>Control cells</b>              | 0.293        | 0.291 | 0.293 | 0.280        | 0.326 | 0.304 |
| <b>90BGly</b>                     | 0.241        | 0.251 | 0.215 | 0.233        | 0.233 | 0.229 |
| <b>Glt-Ph</b>                     | 0.208        | 0.211 | 0.232 | 0.319        | 0.331 | 0.315 |
| <b>H<sub>2</sub>O<sub>2</sub></b> | 0.272        | 0.267 | 0.295 | 0.299        | 0.312 | 0.302 |
| <b>HRP</b>                        | 0.271        | 0.284 | 0.289 | 0.309        | 0.314 | 0.297 |
